# Supplementary material for: Ov-rich γ-MnO2 enhanced electrocatalytic three-electron oxygen reduction to hydroxyl radicals for sterilization in neutral media
Source: Royal Society of Chemistry journal article supplement (doi:10.1039/d4nh00289j), 2024-01-01
Supplement: d4nh00289j1.pdf [file d4nh00289j1.pdf]

## Supplementary Information

### **O<sub>v</sub>-rich $\gamma$ -MnO<sub>2</sub> enhanced electrocatalytic three-electron oxygen reduction to hydroxyl radicals for sterilization in neutral media**

Yingnan Qin <sup>a</sup>, Tongzhu Han <sup>b</sup>, Ligang Chen <sup>\*c</sup>, Kexin Yan <sup>d</sup>, Jing Wang <sup>e</sup>, Ning Wang <sup>\*a</sup>, Baorong Hou <sup>a</sup>

<sup>a</sup> Key Laboratory of Advanced Marine Materials, Key Laboratory of Marine Environmental Corrosion and Bio-fouling, Institute of Oceanology, Chinese Academy of Sciences, Qingdao, 266071, China

<sup>b</sup> Marine Bioresource and Environment Research Center, Key Laboratory of Marine Eco-Environmental Science and Technology, First Institute of Oceanography, Ministry of Natural Resources, Qingdao, 266061, China

<sup>c</sup> State Power Investment Corporation Hydrogen Energy Company, Limited, Beijing 102600, China

<sup>d</sup> College of Environmental and Safety Engineering, Qingdao University of Science and Technology, Qingdao 266042, PR China

<sup>e</sup> College of Chemical Engineering, Qingdao University of Science and Technology, Qingdao 266042, PR China

### Electrochemical measurements.

All the electrochemical tests were conducted on CS2350M electrochemical workstation (Wuhan Corrtest Instrument Co., LTD). Before electrochemical measurements, 5 mg of as-prepared catalysts were dispersed in 1 mL mixture of DI water, ethanol, and 5 wt% Nafion solution (volume ratio is 1: 1: 0.0001) to form a uniform ink. All the electrochemical measurements were conducted in a three-electrode system, with a catalyst-modified RRDE as working electrode, saturated calomel electrode (SCE) as reference electrode, and carbon rod as counter electrode. 10  $\mu$ L ink was dropped onto the glassy carbon disk electrode of RRDE, and rotary drying under the ambient environment. Cyclic voltammetry was conducted in  $N_2$ -saturated 3.5 wt% NaCl solution at a potential range of 0-1.2 V vs. RHE, with a scan rate of 500 mV/s for 50 cycles, to get a stable curve. The linear polarization curve (LSV) was measured at 0-1.1 V vs. RHE with a scan rate of 20 mV/s and a rotate speed of 1600 rpm. The RRDE tests were performed in an  $O_2$ -saturated solution with a scan rate of 20 mV/s and rotate speed of 1600 rpm, with the ring potential was fixed at 1.2 V vs. RHE. The selectivity of  $H_2O_2$  ( $H_2O_2\%$ ) via  $2e^-$  ORR pathway and the number of transfer-electron ( $n$ ) can be calculated by the following equation based on the disk current ( $I_D$ ) and ring current ( $I_R$ ) measured by RRDE.

$$H_2O_2\% (\%) = \frac{200 \times I_R/N}{|I_D| + I_R/N} \quad (S1)$$

$$n = \frac{4 \times |I_D|}{|I_D| + I_R/N} \quad (S2)$$

Here, N refers to the collection coefficient of RRDE, which depends on only the size of RRDE and is 37% in this system.

### $H_2O_2$ yield tests.

The tests of  $H_2O_2$  yield were conducted in a traditional three-electrode system with catalyst-loaded carbon paper (mass loading: 0.2 mg  $cm^{-2}$ ) as working electrode, saturated calomel electrode as reference electrode, and graphite rod as counter electrode. All the tests were performed in 35 mL  $O_2$ -saturated 3.5 wt% NaCl solution at 0.1 V (vs. RHE) for 2 h in a separate chamber with Nafion 117 as the membrane. The concentration of  $H_2O_2$  was measured using the cerium sulfate titration method based on

the color variation with  $Ce^{4+}$  concentration as described in Eq. S3. The  $Ce^{4+}$  concentration-absorbance standard curve was plotted by UV-visible adsorption peak at 318 nm for a range of  $Ce^{4+}$  solutions, and the final correction curve was  $y = -0.015 + 5.21x$  ( $y$  is UV-visible absorbance,  $x$  is the concentration of  $Ce^{4+}$ ). The electrolyte after i-t test was mixed with 0.5 mM  $Ce(SO_4)_2$  solution at a volume ratio of 1: 49, and reacted for another 2 h, and the corresponding  $H_2O_2$  concentration ( $c_{H_2O_2}$ ) was calculated by Eq. S4. Finally, the  $H_2O_2$  yield was calculated by Eq. S5.

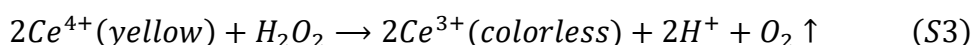

$$c_{H_2O_2} \text{ (mM)} = \frac{(c_0 - x)/2}{1/50} \quad (S4)$$

Where the  $c_0$  is the original  $Ce^{4+}$  standard solution with a concentration of 0.5 mM.

$$H_2O_2 \text{ yield rate (mmol g}_{cat}^{-1} \text{ h}^{-1}) = \frac{c_{H_2O_2} \cdot v}{t \cdot m_{cat}} \quad (S5)$$

Where  $v$  is the volume of electrolyte (35 mL),  $t$  is reaction time (2 h), and  $m_{cat}$  is the loading mass of as-prepared catalysts ( $0.2 \mu\text{g cm}^{-2}$ ).

#### **Conditions of on-line SPE LC-MS/MS system.**

Salicylic acid in samples was concentrated and detected by the on-line SPE-LC-MS/MS system, which was carried out on a 1290 II ultrahigh-performance liquid chromatography coupled with a 6470 triple quadrupole mass spectrometry system (Agilent, Santa Clara, CA, USA). A schematic of the online SPE-LC-MS/MS is presented in **Fig. S1**. The online SPE system consists of a high-performance (with a 900  $\mu\text{L}$  sample loop), a quaternary pump (P1), binary pump (P2) and a thermostatic column compartment equipped with a six-port valve. Chromatographic separation was performed on a Zorbax Extend C18 ( $3.5 \mu\text{m}$ ,  $3.0 \text{ mm} \times 150 \text{ mm}$ ) from Agilent (Santa Clara, CA, USA). A guard column Zorbax Eclipse XDB-C8 ( $5 \mu\text{m}$ ,  $2.1 \text{ mm} \times 12.5 \text{ mm}$ ) from Agilent was employed as a trap column for the online SPE. Details of on-line SPE-LC-MS/MS conditions are listed in **Table S1 and S2**.

#### **DFT calculation.**

All density functional theory (DFT) calculations carried out on the  $MnO_2(O_v)$  and  $Mn_3O_4(O_v)$  catalysts were performed via Vienna ab initio simulation package (VASP) with the projector augmented wave (PAW) method<sup>1</sup>. The generalized gradient

approximation (GGA) with the Perdew-Burke-Ernzerhof (PBE) was adopted to describe the exchange-correlation functional<sup>2</sup>. The DFT-D3 method is used to introduce van der Waals (vdW) interaction. Spin polarization was considered in the calculation<sup>3</sup>. The U parameter of the Mn atom is set to 4 eV<sup>4</sup>. The kinetic energy cutoff was set to 400 eV, and the force and energy convergence criteria were set to 0.03 eV/Å and 10<sup>-4</sup> eV, respectively.

A slab model of MnO<sub>2</sub> with (300) crystal faces consisting of 16 Mn atoms and 32 O atoms was constructed using an optimized MnO<sub>2</sub> single cell. A slab model of Mn<sub>3</sub>O<sub>4</sub> with (101) crystal faces consisting of 28 Mn atoms and 48 O atoms was constructed using an optimized Mn<sub>3</sub>O<sub>4</sub> single cell. The vacuum layer of the slab model for MnO<sub>2</sub> and Mn<sub>3</sub>O<sub>4</sub> is set to 20 Å. MnO<sub>2</sub>(O<sub>v</sub>) and Mn<sub>3</sub>O<sub>4</sub>(O<sub>v</sub>) slab models with oxygen vacancies are constructed by removing one oxygen atom from the surface of the MnO<sub>2</sub> and Mn<sub>3</sub>O<sub>4</sub> slab models. For geometric optimization, the bottom two atomic layers of all slab models are fixed, and the upper atomic layers remain relaxed.

The adsorption energy of O<sub>2</sub> molecules at active sites on the catalyst surface was calculated by the following equation:

$$\Delta E_{*O_2} = E_{*O_2} - E_* - E_{O_2}$$

Where \* refers to O<sub>v</sub>-γ-MnO<sub>2</sub> or O<sub>v</sub>-Mn<sub>3</sub>O<sub>4</sub>. E<sub>\*O<sub>2</sub></sub> refer to the total energy after the adsorption of O<sub>2</sub> on the catalyst surface. E<sub>\*</sub> is the total energy of the catalyst. E<sub>O<sub>2</sub></sub> refer to the energy of O<sub>2</sub> molecules.

During the calculation of the reaction mechanism, Gibbs free energy (G) was obtained by the following equation:

$$G = E + ZPE - TS$$

Where E, ZPE and TS were total energy, zero-point energy and entropic contributions, respectively. ZPE and TS were processed by the vaspkit code at 298.15 K<sup>5</sup>.

#### **Antibacterial performance tests.**

*Pseudomonas aeruginosa* (*P. aeruginosa*) and *staphylococcus aureus* (*S. aureus*) were used as the typical strain to invest the antibacterial performance of as-prepared catalysts. First of all, the typical strains were cultured in LB medium, after 12 h preservation at

37°C, the bacteria body was centrifugated at 4000 rpm for 5 min, and redispersed in 0.1 M phosphate buffer saline (PSB) to get a uniform solution with a concentration of  $10^7$  cfu/mL. The antibacterial test was carried in 35 mL above solution, with catalyst-modified carbon paper ( $1 \times 2$  cm, with a loading mass of  $0.2 \text{ mg/cm}^2$ ) as working electrode, SCE as reference electrode, and carbon rod as counter electrode. Electrolytes were collected after 0, 10, 30, 60, 120, and 180 min chronoamperometry test with an applied potential at 0.1 V vs. RHE. Coating the above electrolytes onto nutrient agar medium plates, keeping at 37°C for 24 h, counting the colony number of each plate and calculating the disinfection rate with the variation of time.

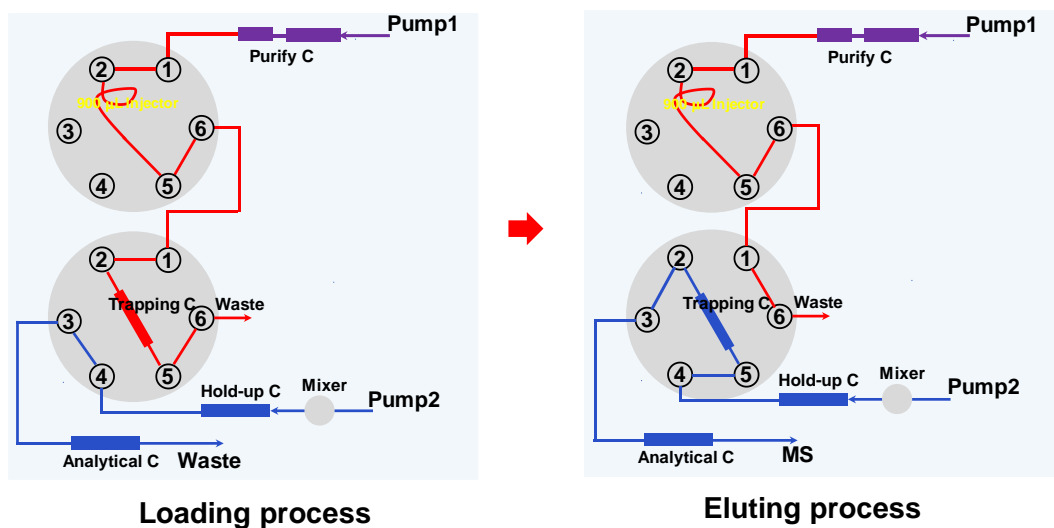

Figure S1 Schematic of the online SPE-LC-MS/MS.

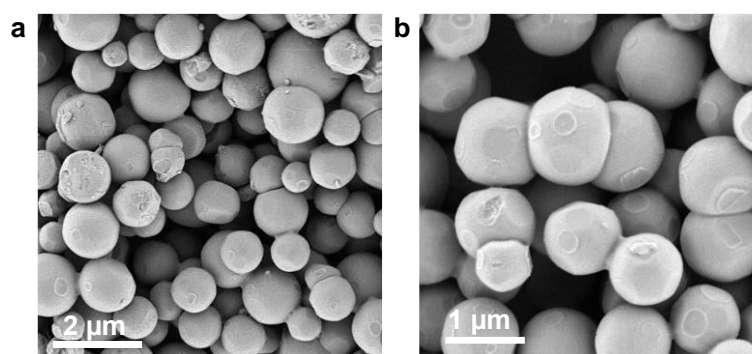

Figure S2 SEM images of PBA precursor.

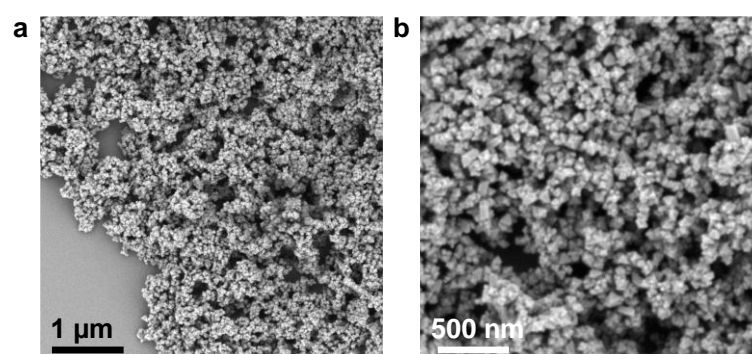

Figure S3 SEM images of ammonia-treated PBA.

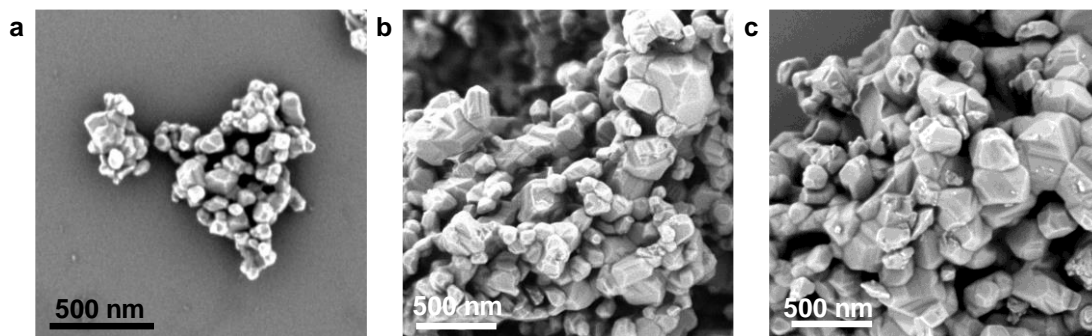

**Figure S4** SEM images of  $\text{Mn}_3\text{O}_4\text{-x}$  with different calcination temperature. (a)  $\text{Mn}_3\text{O}_4\text{-700}$ , (b)  $\text{Mn}_3\text{O}_4\text{-800}$ , (c)  $\text{Mn}_3\text{O}_4\text{-900}$ .

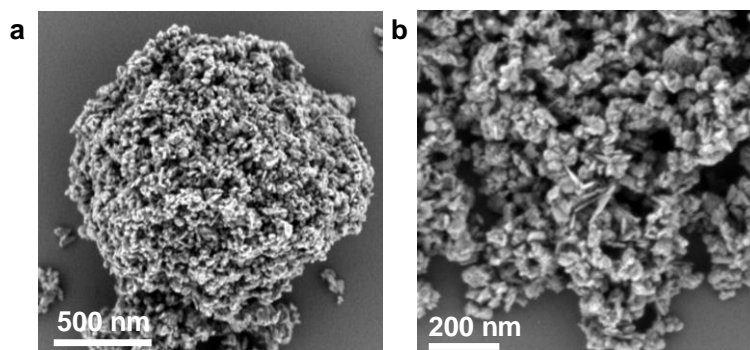

**Figure S5** SEM images of  $\text{MnO}_2\text{-700A}$

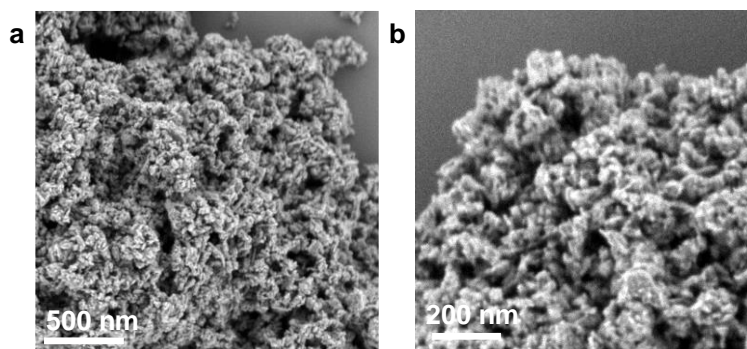

**Figure S6** SEM images of  $\text{MnO}_2\text{-800A}$

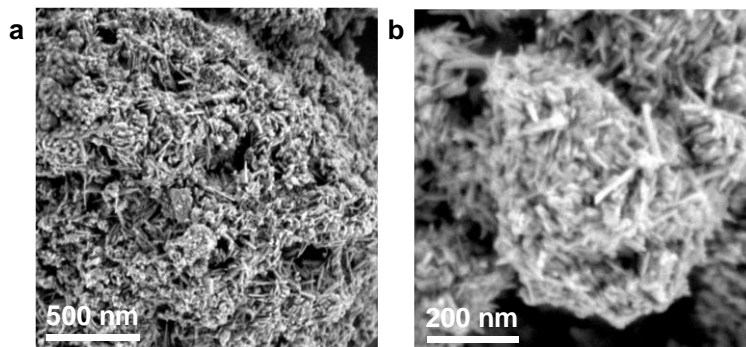

Figure S7 SEM images of MnO<sub>2</sub>-900A

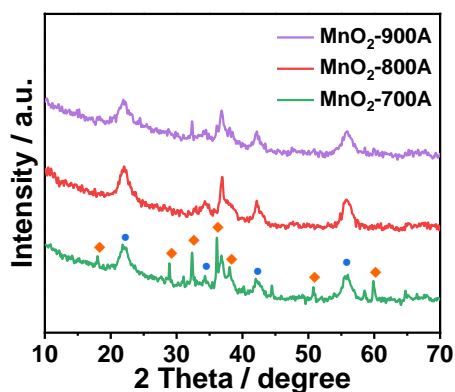

Figure S8 XRD patterns of as-prepared MnO<sub>2</sub>-xA catalysts.

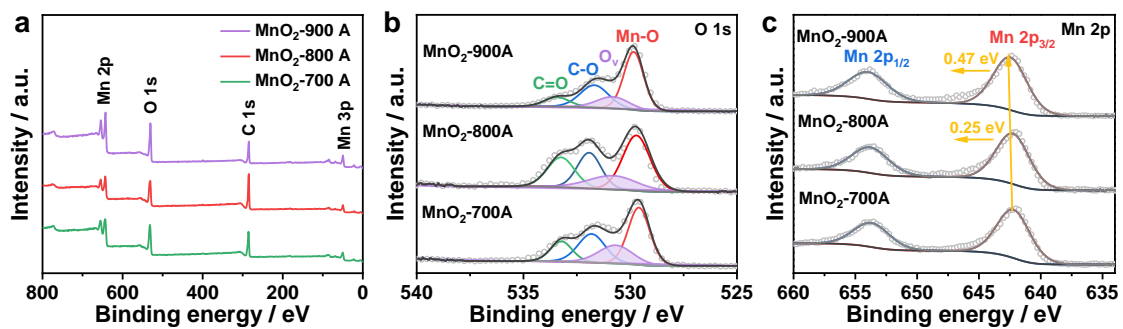

Figure S9 XPS patterns of as-prepared MnO<sub>2</sub>-xA catalysts. (a) survey-scan spectra, (b) O 1s spectra, (c) Mn 2p spectra.



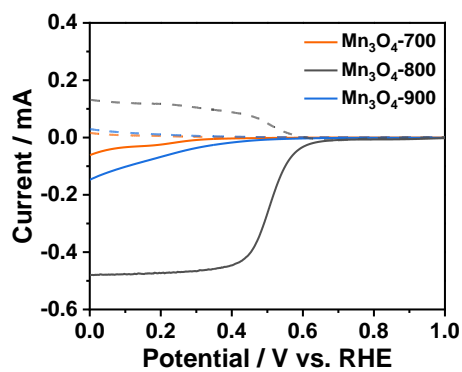

Figure S10 RRDE polarization curves of  $\text{Mn}_3\text{O}_{4-x}$ .

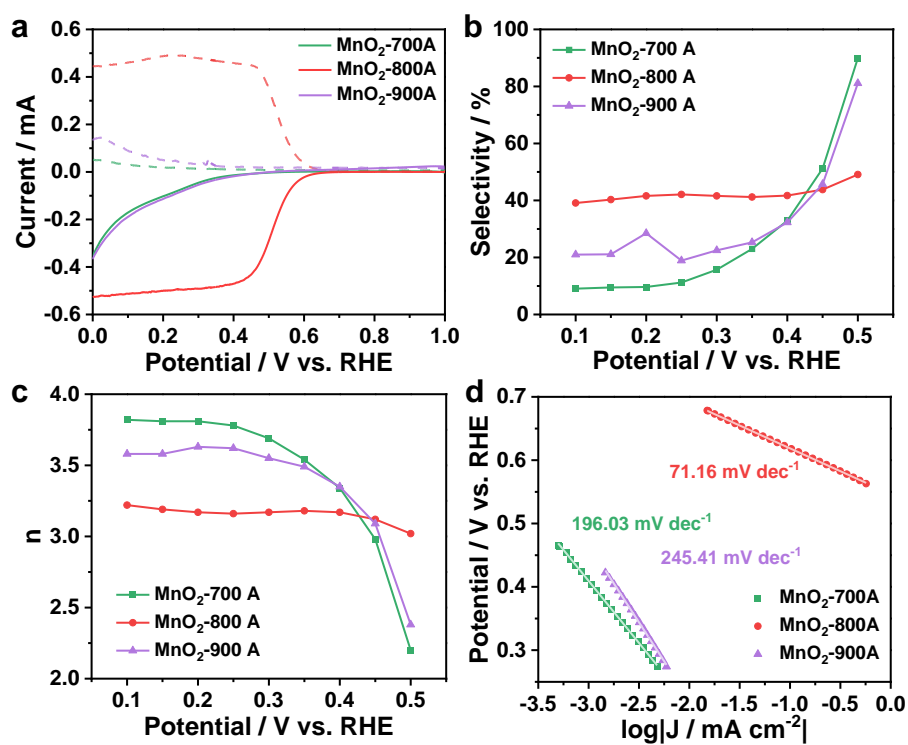

Figure S11 Electrochemical performance of as-prepared  $\text{MnO}_2-x\text{A}$  catalysts. (a) RRDE polarization curves, (b)  $\text{H}_2\text{O}_2$  selectivity, (c) number of transfer electron, (d) Tafel curves.

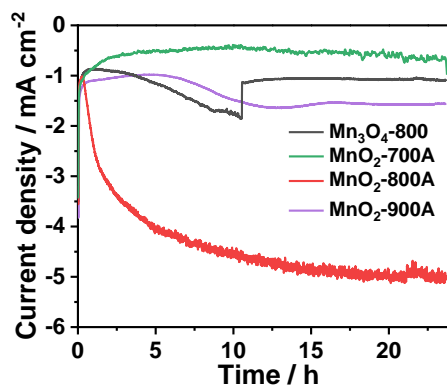

**Figure R12** The stability of as-prepared catalysts.

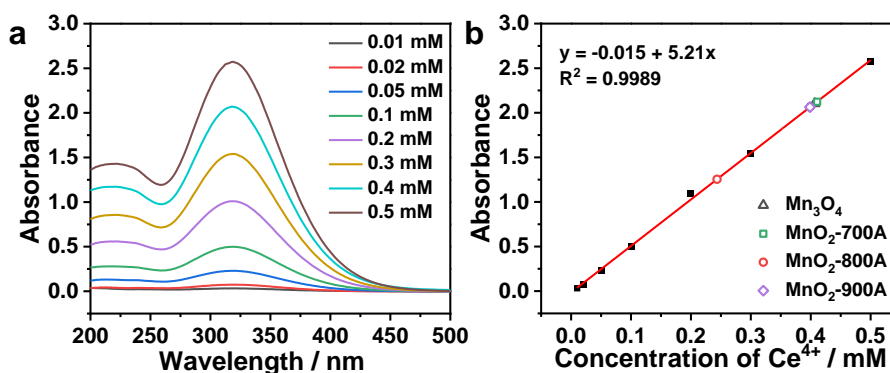

**Figure 13** (a) UV-visible spectra of  $\text{CeSO}_4$  at various concentrations, (b) calibration curve of the absorbance and  $\text{Ce}^{4+}$  concentration at 318 nm.

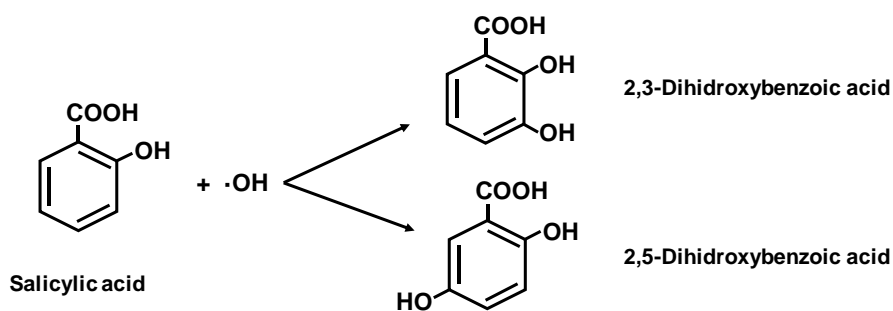

**Figure S14** The equation of the reaction of salicylic acid and hydroxyl radical.

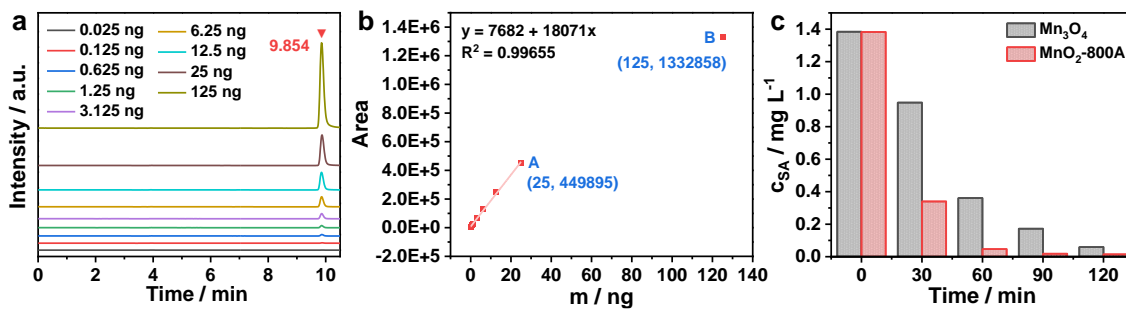

**Figure S15** (a) curves of LC-MS/MS for salicylic acid at different masses, (b) calibration curve of the peak area and mass of salicylic acid, (c) variation of salicylic acid concentration with different reaction times.

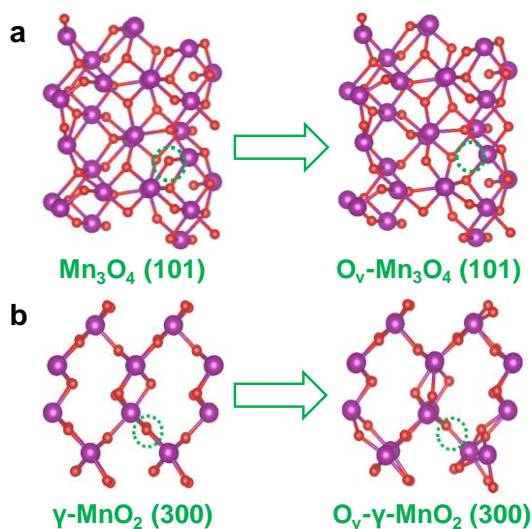

**Figure S16** The configurations of (a)  $\text{Mn}_3\text{O}_4$  (101),  $\text{O}_v\text{-Mn}_3\text{O}_4$  (101), (b)  $\gamma\text{-MnO}_2$  (300) and  $\text{O}_v\text{-}\gamma\text{-MnO}_2$  (300) models.

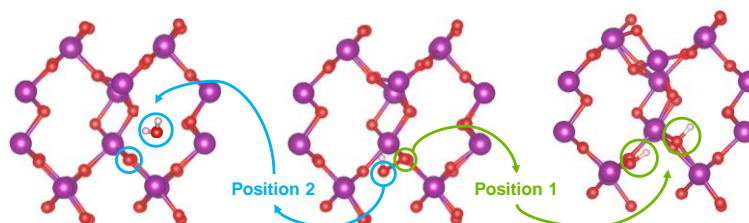

**Figure S17** The O position on adsorbed  $\text{*OOH}$  in  $\text{O}_v\text{-}\gamma\text{-MnO}_2$  (300).

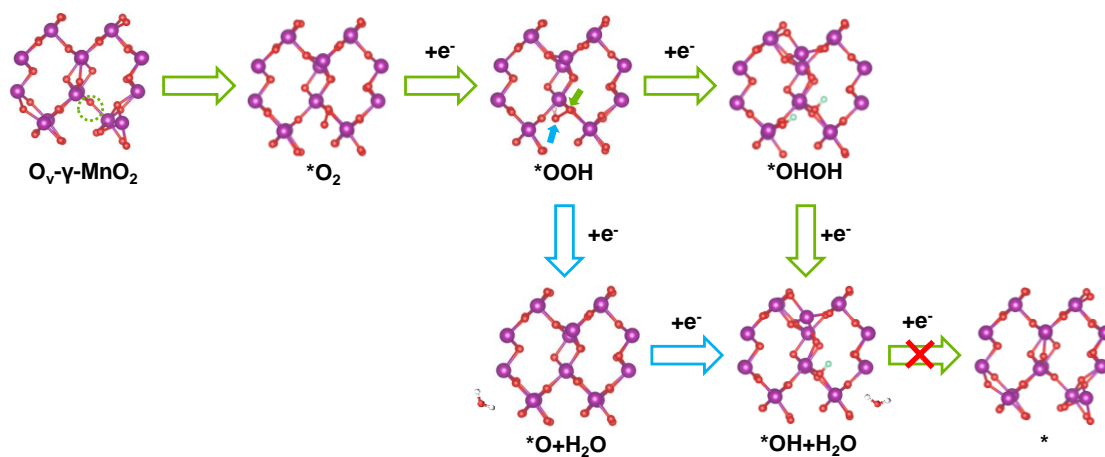

**Figure S18** Geometry adsorption configurations of  $3e^-$  ORR progress on  $O_v\text{-}\gamma\text{-MnO}_2$  (300).

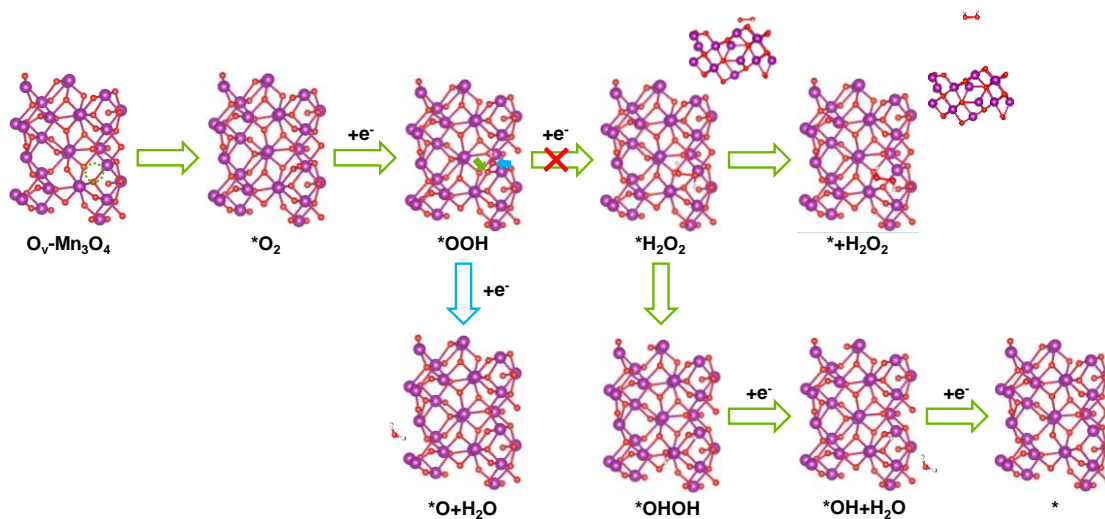

**Figure S19** Geometry adsorption configurations of  $3e^-$  ORR progress on  $O_v\text{-Mn}_3O_4$  (101).

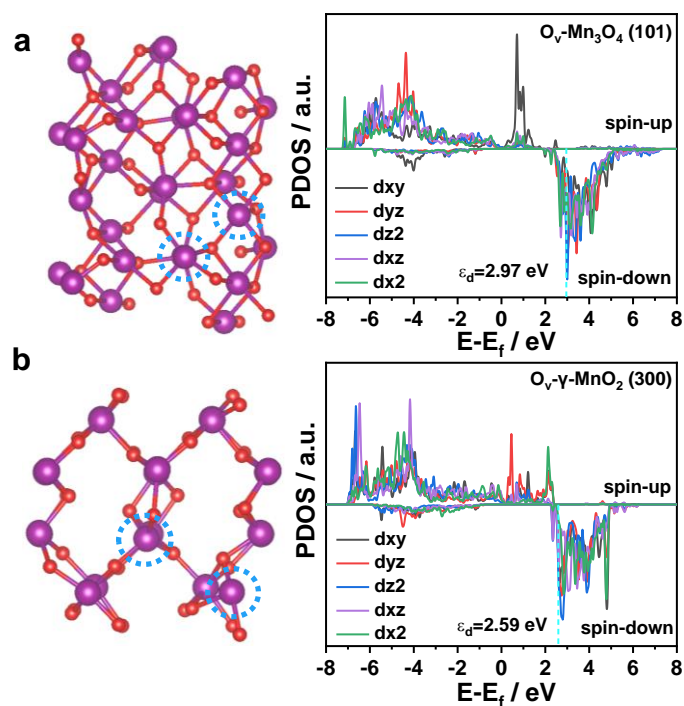

**Figure S20** The projected density of state (PDOS) analysis. **(a)**  $O_V\text{-Mn}_3\text{O}_4$  (101) and **(b)**  $O_V\text{-}\gamma\text{-MnO}_2$  (300). (The two Mn atoms in the blue dotted circles are the active sites of as-prepared catalysts, all the PDOS and d-band center analysis are based on that.)

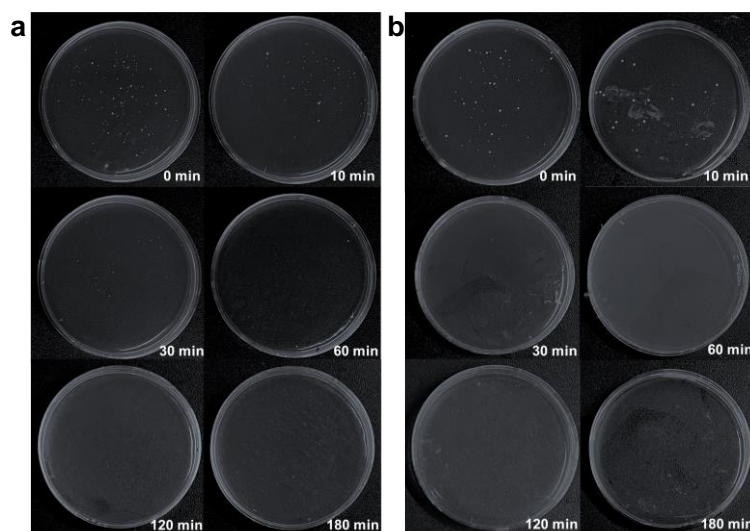

**Figure S21** Digital pictures of colony plates with different reaction times without the addition of IPA. **(a)** *P. aeruginosa*, **(b)** *S. aureus*.

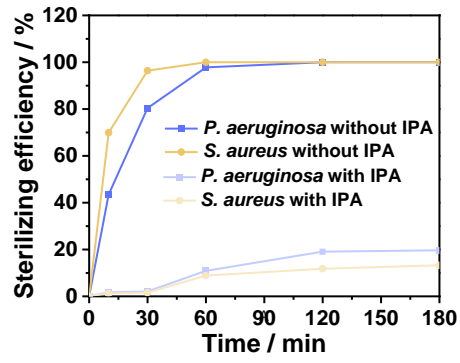

**Figure S22** Variety of sterilization efficiencies for different reaction times.

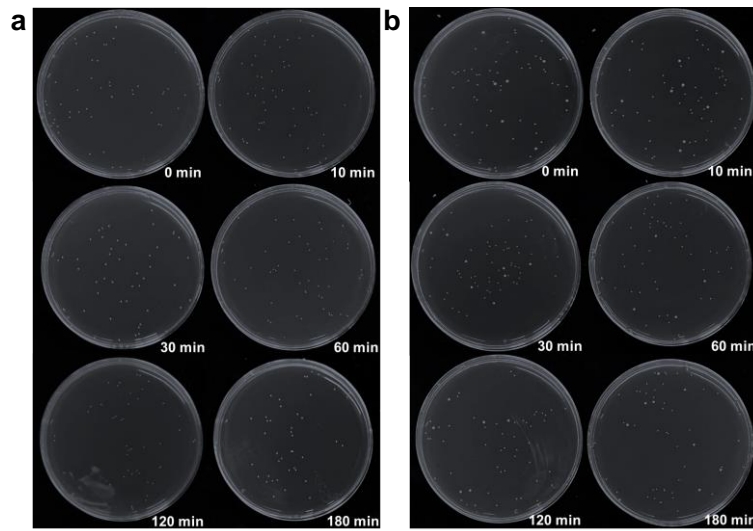

**Figure S23** Digital pictures of colony plates with different reaction times with the addition of IPA. (a) *P. aeruginosa*, (b) *S. aureus*.

**Table S1. LC parameters and MS/MS parameters of the instrumental method for Salicylic acid analysis.**

| LC parameters                |                                                                                                  |                                  |       |               |               |
|------------------------------|--------------------------------------------------------------------------------------------------|----------------------------------|-------|---------------|---------------|
| <b>Instrument</b>            | HPLC 1260 and UPLC 1290 (Agilent Technologies, USA)                                              |                                  |       |               |               |
| <b>Analytical column</b>     | Zorbax Extend C18, 3.5 $\mu\text{m}$ , 3.0 mm $\times$ 150 mm (Agilent Technologies, USA)        |                                  |       |               |               |
| <b>Trapping column</b>       | Zorbax Eclipse XDB-C8, 5 $\mu\text{m}$ , 2.1 mm $\times$ 12.5 mm (Agilent Technologies, USA)     |                                  |       |               |               |
| <b>Injection volume</b>      | 100 $\mu\text{L}$<br>(Needle rinsed once with 1:1 methanol: water before injection)              |                                  |       |               |               |
| <b>Column temperature</b>    | 30 $^{\circ}\text{C}$                                                                            |                                  |       |               |               |
| <b>Mobile phases UP 1290</b> | Flow rate: 0.3 mL min <sup>-1</sup><br>A1: Ultrapure water with 0.5% formic acid<br>B1: Methanol |                                  |       |               |               |
| <b>Mobile phases HP 1260</b> | A: Ultrapure water with 0.5% formic acid<br>B: Methanol                                          |                                  |       |               |               |
| <b>Gradient UP 1290</b>      | Time / min                                                                                       | A / %                            | B / % | note          |               |
|                              | 0.0                                                                                              | 80                               | 20    | equilibration |               |
|                              | 2.0                                                                                              | 80                               | 20    |               |               |
|                              | 7.0                                                                                              | 50                               | 50    |               |               |
|                              | 10.5                                                                                             | 0                                | 100   |               |               |
| <b>Gradient HP 1260</b>      | Time / min                                                                                       | Flow rate / mL min <sup>-1</sup> | A / % | B / %         | note          |
|                              | 0                                                                                                | 0.5                              | 95    | 0             | loading       |
|                              | 2                                                                                                | 0.5                              | 95    | 0             |               |
|                              | 10.5                                                                                             | 0.5                              | 95    | 0             | equilibration |
| MS/MS parameters             |                                                                                                  |                                  |       |               |               |
| <b>Instrument</b>            | 6470 triple quadrupole mass spectrometer (Agilent)                                               |                                  |       |               |               |

|                          |                                                |
|--------------------------|------------------------------------------------|
|                          | Technologies, USA)                             |
| <b>Ion source</b>        | Agilent Jet stream (Agilent Technologies, USA) |
| <b>Ionization</b>        | Electrospray ionization (ESI) in negative mode |
| <b>Gas temp</b>          | 300 °C                                         |
| <b>Gas flow</b>          | 3 L/min                                        |
| <b>Nebulizer</b>         | 5 psi                                          |
| <b>Sheath gas temp</b>   | 350 °C                                         |
| <b>Sheath gas flow</b>   | 7 L/min                                        |
| <b>Capillary voltage</b> | 3500 V                                         |
| <b>Scan type</b>         | MS2 SIM                                        |

**Table S2. Retention times, molecular formula (precursor ion), monitored mass, fragmentor, collision energy.**

| <b>Acronym<br/>analyte</b> | <b>Retention<br/>Time /min</b> | <b>Molecular<br/>formula</b>                                 | <b>Monitored<br/>mass / m/z</b> | <b>Fragmentor<br/>/ V</b> | <b>Collision<br/>energy / V</b> |
|----------------------------|--------------------------------|--------------------------------------------------------------|---------------------------------|---------------------------|---------------------------------|
| SA                         | 9.85                           | [C <sub>7</sub> H <sub>6</sub> O <sub>3</sub> ] <sup>-</sup> | 137                             | 100                       | 5                               |

**Table S3 Binding energy and  $\Delta E$  of as-prepared catalysts in Mn 3s XPS spectra.**

|                                        | <b>Binding energy /<br/>eV</b> | <b><math>\Delta E</math> /eV</b> |
|----------------------------------------|--------------------------------|----------------------------------|
| <b>Mn<sub>3</sub>O<sub>4</sub>-800</b> | 88.59 / 83.08                  | 5.51                             |
| <b>MnO<sub>2</sub>-700A</b>            | 89.05 / 84.23                  | 4.82                             |
| <b>MnO<sub>2</sub>-800A</b>            | 88.76 / 83.99                  | 4.77                             |
| <b>MnO<sub>2</sub>-900A</b>            | 88.78 / 83.94                  | 4.84                             |

**Table S4 Percentage of O with different configuration of as-prepared catalysts in O 1s spectra.**

|                                        | <b>Mn-O</b> | <b>O<sub>v</sub></b> | <b>C-O</b> | <b>C=O</b> |
|----------------------------------------|-------------|----------------------|------------|------------|
| <b>Mn<sub>3</sub>O<sub>4</sub>-800</b> | 55.4        | 26.5                 | 9.4        | 8.7        |



|                             |      |      |      |      |
|-----------------------------|------|------|------|------|
| <b>MnO<sub>2</sub>-700A</b> | 38.8 | 19.4 | 12.2 | 29.6 |
| <b>MnO<sub>2</sub>-800A</b> | 39.1 | 17.6 | 22.2 | 21.1 |
| <b>MnO<sub>2</sub>-900A</b> | 47.9 | 15.5 | 26.7 | 9.9  |

**Table S5** The peak intensity of UV-visible spectrum and the corresponding Ce<sup>4+</sup> concentration, the amount of H<sub>2</sub>O<sub>2</sub> and its yield rate after 2 h i-t tests.

|                                        | <b>Peak intensity</b> | <b>c<sub>Ce4+</sub> / mM</b> | <b>n<sub>H2O2</sub> / mmol</b> | <b>H<sub>2</sub>O<sub>2</sub> yield rate / mmol g<sup>-1</sup> h<sup>-1</sup></b> |
|----------------------------------------|-----------------------|------------------------------|--------------------------------|-----------------------------------------------------------------------------------|
| <b>Mn<sub>3</sub>O<sub>4</sub>-800</b> | 2.10                  | 0.406                        | 82.25                          | 205.63                                                                            |
| <b>MnO<sub>2</sub>-700A</b>            | 2.12                  | 0.401                        | 78.75                          | 196.88                                                                            |
| <b>MnO<sub>2</sub>-800A</b>            | 1.25                  | 0.243                        | 224..88                        | 562.19                                                                            |
| <b>MnO<sub>2</sub>-900A</b>            | 2.06                  | 0.398                        | 89.25                          | 223.13                                                                            |

**Table S6** The peak area of HPLC curve and the corresponding SA mass and ·OH concentration.

| <b>Reaction Time / min</b> | <b>Mn<sub>3</sub>O<sub>4</sub></b> |                            |                                 | <b>MnO<sub>2</sub>-800A</b> |                            |                                 |
|----------------------------|------------------------------------|----------------------------|---------------------------------|-----------------------------|----------------------------|---------------------------------|
|                            | <b>Peak area</b>                   | <b>m<sub>SA</sub> / ng</b> | <b>C·OH / mg L<sup>-1</sup></b> | <b>Peak area</b>            | <b>m<sub>SA</sub> / ng</b> | <b>C·OH / mg L<sup>-1</sup></b> |
| <b>0</b>                   | 1475942                            | 138.42                     | 0                               | 1475896                     | 138.42                     | 0                               |
| <b>30</b>                  | 1010819                            | 94.80                      | 0.436                           | 611287                      | 33.97                      | 1.044                           |
| <b>60</b>                  | 649961                             | 36.12                      | 1.023                           | 91899                       | 4.66                       | 1.337                           |
| <b>90</b>                  | 319297                             | 17.24                      | 1.211                           | 40791                       | 1.83                       | 1.336                           |
| <b>120</b>                 | 115031                             | 5.94                       | 1.325                           | 33923                       | 1.45                       | 1.369                           |

**Table S7** 3e<sup>-</sup> ORR performance comparison between different catalysts.

| <b>Sample</b> | <b>H<sub>2</sub>O<sub>2</sub> yield</b> | <b>·OH yield</b> | <b>Application</b>                               | <b>Ref.</b>  |
|---------------|-----------------------------------------|------------------|--------------------------------------------------|--------------|
| <b>OCNT</b>   | 12 mg L <sup>-1</sup> cm <sup>-1</sup>  |                  | 97.05 % of STZ degradation efficiency in 180 min | <sup>6</sup> |

|                                         |                                                        |                                             |                                                                                                                                   |           |
|-----------------------------------------|--------------------------------------------------------|---------------------------------------------|-----------------------------------------------------------------------------------------------------------------------------------|-----------|
| <b>Cu/CoSe<sub>2</sub>/C</b>            |                                                        |                                             | 98% of CIP degradation efficiency in 60 min                                                                                       | 7         |
| <b>TiO<sub>2</sub>/C cathode</b>        |                                                        | 2.69 $\mu\text{g cm}^{-2} \text{ min}^{-1}$ |                                                                                                                                   | 8         |
| <b>FeCoC</b>                            | 1350 $\pm$ 38.9 $\mu\text{M}/2 \text{ h}$              |                                             | 100.0 % removal of CIP in 5 min                                                                                                   | 9         |
| <b>1.0-MnCu/C</b>                       |                                                        |                                             | 94.7% removal of TCH in 60 min                                                                                                    | 10        |
| <b>FeCl<sub>2</sub>C<sub>x</sub>/PC</b> |                                                        | 48.86 $\mu\text{M t}$                       | 98.12% removal of AMX in 15 min                                                                                                   | 11        |
| <b>MnO<sub>2</sub>-800A</b>             | 562.2 $\text{mmol g}_{\text{cat}}^{-1} \text{ h}^{-1}$ | 2.09 $\text{mg L}^{-1} \text{ h}^{-1}$      | 97.8% sterilization efficiency of <i>P. aeruginosa</i> in 60 min;<br>96.4% sterilization efficiency of <i>S. aureus</i> in 30 min | This work |

## References:

1. G. Kresse, *Physical Review B* 1996, **54**, 11169-11186.
2. K. B. John P. Perdew, Matthias Ernzerhof, *Phys. Rev. Lett.*, 1996, **77**, 3865-3868.
3. S. Grimme, *J. Comput. Chem.*, 2006, **27**, 1787-1799.
4. Z. Shi, Y. Wang, J. Li, X. Wang, Y. Wang, Y. Li, W. Xu, Z. Jiang, C. Liu, W. Xing and J. Ge, *Joule*, 2021, **5**, 2164-2176.
5. V. Wang, N. Xu, J.-C. Liu, G. Tang and W.-T. Geng, *Comput. Phys. Commun.*, 2021, **267**, 108033.
6. J. Zhang, S. Qiu and F. Deng, *J. Hazard. Mater.*, 2024, **465**, 133261.
7. L. Xie, P. Wang, W. Zheng, S. Zhan, Y. Xia, Y. Liu, W. Yang and Y. Li, *Proc. Natl. Acad. Sci. U. S. A.*, 2023, **120**, e2307989120.
8. F. Miao, M. Gao, X. Yu, P. Xiao, M. Wang, Y. Wang, S. Wang and X. Wang, *Electrochem. Commun.*, 2020, **113**, 106687.
9. F. Xiao, Z. Wang, J. Fan, T. Majima, H. Zhao and G. Zhao, *Angew. Chem. Int. Ed.*, 2021, **60**, 10375-10383.
10. D. Shang, S. Wang, J. Li, S. Zhan, W. Hu and Y. Li, *Small*, 2024, 2311984.
11. R. Ren, X. Shang, Z. Song, C. Li, Z. Wang, F. Qi, A. Ikhtlaq, J. Kumirska, E. Maria Siedlecka and O. Ismailova, *Chem. Eng. J.*, 2023, **474**, 145545.
